# Supplementary material for: Activity Concentrations of Cs-137, Sr-90, Am-241, Pu-238, and Pu-239+240 and an Assessment of Pollution Sources Based on Isotopic Ratio Calculations and the HYSPLIT Model in Tundra Landscapes (Subarctic Zone of Russia)
Source: MDPI journal article supplement (doi:10.3390/app132312952), 2023-12-04
Supplement: s1 [file s1]

**Table S1.** Activity and pollution density of anthropogenic radionuclides in the Nes River basin (Nenets Autonomous Okrug).

| ID sample | Coordinates |           | Activity, Bq·kg <sup>-1</sup> /Pollution density, Bq·m <sup>-2</sup> |              |                   |              |                   |           |                   |            |                   |            |
|-----------|-------------|-----------|----------------------------------------------------------------------|--------------|-------------------|--------------|-------------------|-----------|-------------------|------------|-------------------|------------|
|           |             |           | Pollution density, Ci·km <sup>-2</sup>                               |              |                   |              |                   |           |                   |            |                   |            |
|           | Latitude    | Longitude | Cs-137                                                               |              | Sr-90             |              | Am-241            |           | Pu-238            |            | Pu-239+240        |            |
| NS-32     | 66,55431    | 44,55055  | 102,5±10,6                                                           | 3086,0±319,7 | 33,3±8,3          | 1003,3±248,4 | 1,0±0,6           | 30,4±16,8 | 0,34±0.11         | 10,36±3.25 | -                 | -          |
|           |             |           | 8,34E-02±8,64E-03                                                    |              | 2,71E-02±6,71E-03 |              | 8,21E-04±4,53E-04 |           | 2,80E-04±8,79E-05 |            | -                 | -          |
| NS-33     | 66,56086    | 44,57282  | 111,1±12,5                                                           | 3109,8±350,3 | 42,8±10,0         | 1199,2±279,9 | 1,1±0,6           | 32,0±16,6 | 0,23±0.08         | 6,50±2.3   | 2,5±0,4           | 70,8±12,0  |
|           |             |           | 8,40E-02±9,47E-03                                                    |              | 3,24E-02±7,57E-03 |              | 8,64E-04±4,48E-04 |           | 1,76E-04±6,21E-05 |            | 1,91E-03±3,25E-04 |            |
| NS-34     | 66,57073    | 44,58314  | 121,3±11,7                                                           | 3533,3±339,5 | 42,2±9,9          | 1230,0±287,2 | 0,9±0,5           | 27,2±15,6 | 0,08±0.03         | 2,42±0.75  | 2,8±0,5           | 80,9±13,7  |
|           |             |           | 9,55E-02±9,18E-03                                                    |              | 3,32E-02±7,76E-03 |              | 7,35E-04±4,22E-04 |           | 6,53E-05±2,02E-05 |            | 2,19E-03±3,71E-04 |            |
| NS-35     | 66,5819     | 44,58855  | 108,9±12,5                                                           | 4845,7±554,3 | 42,2±9,5          | 1876,4±424,6 | 0,9±0,3           | 41,0±13,5 | 0,26±0.10         | 11,73±4.55 | 3,4±0,6           | 149,5±25,4 |
|           |             |           | 1,31E-01±1,50E-02                                                    |              | 5,07E-02±1,15E-02 |              | 1,11E-03±3,65E-04 |           | 3,17E-04±1,23E-04 |            | 4,04E-03±6,86E-04 |            |
| NS-36     | 66,59412    | 44,5846   | 128,5±14,0                                                           | 4639,0±504,5 | 40,3±9,7          | 1455,3±349,9 | 0,9±0,5           | 31,8±18,2 | 0,12±0.03         | 4,26±1.07  | 2,9±0,5           | 104,1±17,7 |
|           |             |           | 1,25E-01±1,36E-02                                                    |              | 3,93E-02±9,46E-03 |              | 8,60E-04±4,93E-04 |           | 1,15E-04±2,88E-05 |            | 2,81E-03±4,77E-04 |            |
| NS-38     | 66,60276    | 44,60595  | 23,9±3,5                                                             | 1295,3±190,7 | 18,3±6,3          | 993,2±339,0  | 0,4±0,2           | 22,2±8,7  | -                 | -          | 1,1±0,3           | 58,8±14,5  |
|           |             |           | 3,50E-02±5,15E-03                                                    |              | 2,68E-02±9,16E-03 |              | 6,01E-04±2,34E-04 |           | -                 |            | 1,59E-03±3,93E-04 |            |
| NS-39     | 66,60437    | 44,62981  | 30,7±4,1                                                             | 838,1±111,8  | 9,2±3,4           | 250,0±93,8   | 0,3±0,1           | 7,8±3,1   | 0,10±0.02         | 2,61±0.52  | 0,4±0,1           | 10,2±1,4   |
|           |             |           | 2,27E-02±3,02E-03                                                    |              | 6,76E-03±2,54E-03 |              | 2,11E-04±8,45E-05 |           | 7,04E-05±1,41E-05 |            | 2,75E-04±3,85E-05 |            |
| NS-40     | 66,60682    | 44,64397  | 35,5±4,7                                                             | 1062,2±141,7 | 25,7±8,3          | 769,5±249,7  | 0,4±0,2           | 10,7±5,2  | 0,19±0.05         | 5,69±1.37  | 1,0±0,1           | 31,3±4,1   |
|           |             |           | 2,87E-02±3,83E-03                                                    |              | 2,08E-02±6,75E-03 |              | 2,88E-04±1,41E-04 |           | 1,54E-04±3,69E-05 |            | 8,46E-04±1,10E-04 |            |
| NS-41     | 66,60718    | 44,65108  | 191,5±17,2                                                           | 3818,4±343,0 | 42,5±9,9          | 847,6±197,9  | 0,8±0,2           | 16,8±4,7  | 0,10±0.03         | 1,91±0.61  | 1,9±0,4           | 38,7±7,1   |
|           |             |           | 1,03E-01±9,27E-03                                                    |              | 2,29E-02±5,35E-03 |              | 4,54E-04±1,27E-04 |           | 5,16E-05±1,65E-05 |            | 1,05E-03±1,93E-04 |            |
| NS-42     | 66,60647    | 44,66303  | 37,5±4,7                                                             | 887,3±111,4  | 12,7±4,5          | 300,3±106,9  | 0,3±0,1           | 6,6±3,2   | 0,08±0.03         | 1,97±0.61  | 0,8±0,1           | 18,8±2,8   |
|           |             |           | 2,40E-02±3,01E-03                                                    |              | 8,11E-03±2,89E-03 |              | 1,78E-04±8,53E-05 |           | 5,33E-05±1,65E-05 |            | 5,08E-04±7,62E-05 |            |
| NS-43     | 66,60632    | 44,66428  | 7,8±2,7                                                              | 399,5±139,8  | 13,6±4,9          | 695,9±249,2  | 0,4±0,2           | 21,5±10,3 | 0,09±0.03         | 4,65±1.53  | 1,0±0,2           | 53,6±8,0   |
|           |             |           | 1,08E-02±3,78E-03                                                    |              | 1,88E-02±6,73E-03 |              | 5,80E-04±2,78E-04 |           | 1,26E-04±4,15E-05 |            | 1,45E-03±2,17E-04 |            |
| NS-19     | 66,60625    | 44,67122  | 39,9±6,2                                                             | 1044,9±162,9 | 26,2±8,5          | 686,7±222,8  | 0,3±0,2           | 9,2±4,4   | -                 | -          | 1,0±0,1           | 25,8±3,9   |
|           |             |           | 2,82E-02±4,40E-03                                                    |              | 1,86E-02±6,02E-03 |              | 2,47E-04±1,19E-04 |           | -                 |            | 6,97E-04±1,04E-04 |            |
| NS-20     | 66,60935    | 44,67632  | 19,5±2,7                                                             | 594,5±83,7   | 21,1±6,8          | 645,2±207,8  | 0,3±0,1           | 7,9±3,7   | -                 | -          | 1,4±0,2           | 43,2±5,6   |
|           |             |           | 1,61E-02±2,26E-03                                                    |              | 1,74E-02±5,62E-03 |              | 2,14E-04±1,01E-04 |           | -                 |            | 1,17E-03±1,52E-04 |            |
| NS-31     | 66,61498    | 44,68884  | 65,7±7,9                                                             | 528,9±63,5   | 22,5±7,4          | 181,4±59,5   | 1,0±0,6           | 8,4±5,0   | 0,41±0.12         | 3,27±0.98  | 2,7±0,5           | 22,0±3,9   |
|           |             |           | 1,43E-02±1,72E-03                                                    |              | 4,90E-03±1,61E-03 |              | 2,26E-04±1,34E-04 |           | 8,83E-05±2,65E-05 |            | 5,93E-04±1,05E-04 |            |
| NS-21     | 66,62161    | 44,71009  | 88,8±10,1                                                            | 1128,6±128,9 | 31,2±9,4          | 396,7±119,0  | 0,5±0,2           | 6,5±2,9   | -                 | -          | 1,0±0,1           | 12,4±1,6   |
|           |             |           | 3,05E-02±3,48E-03                                                    |              | 1,07E-02±3,22E-03 |              | 1,76E-04±7,91E-05 |           | -                 |            | 3,34E-04±4,34E-05 |            |
| NS-30     | 66,62216    | 44,71219  | 91,6±10,1                                                            | 1683,8±185,2 | 24,0±6,9          | 441,0±126,1  | 1,4±0,7           | 25,5±13,7 | -                 | -          | 1,5±0,3           | 27,9±5,5   |
|           |             |           | 4,55E-02±5,01E-03                                                    |              | 1,19E-02±3,41E-03 |              | 6,89E-04±3,70E-04 |           | -                 |            | 7,55E-04±1,50E-04 |            |

|       |          |          |                   |              |                   |             |                   |          |                   |           |                   |          |
|-------|----------|----------|-------------------|--------------|-------------------|-------------|-------------------|----------|-------------------|-----------|-------------------|----------|
| NS-22 | 66,62704 | 44,76274 | 77,0±8,0          | 1023,5±106,9 | 23,4±8,2          | 311,6±109,0 | 0,4±0,2           | 5,8±2,8  | 0,07±0.02         | 0,94±0.31 | 2,5±0,4           | 33,2±5,9 |
|       |          |          | 2,77E-02±2,89E-03 |              | 8,42E-03±2,95E-03 |             | 1,57E-04±7,52E-05 |          | 2,55E-05±8,41E-06 |           | 8,98E-04±1,59E-04 |          |
| NS-23 | 66,63037 | 44,78404 | 111,4±12,3        | 1805,4±198,6 | 23,0±7,4          | 371,8±120,7 | 0,5±0,3           | 8,6±4,1  | 0,09±0.03         | 1,44±0.43 | 2,1±0,4           | 34,6±6,9 |
|       |          |          | 4,88E-02±5,37E-03 |              | 1,00E-02±3,26E-03 |             | 2,34E-04±1,10E-04 |          | 3,89E-05±1,17E-05 |           | 9,35E-04±1,86E-04 |          |
| NS-28 | 66,6409  | 44,77005 | 109,9±11,5        | 406,4±42,6   | 23,0±7,6          | 84,9±28,0   | 0,9±0,5           | 3,2±1,9  | -                 | -         | 0,8±0,1           | 3,0±0,5  |
|       |          |          | 1,10E-02±1,15E-03 |              | 2,29E-03±7,57E-04 |             | 8,69E-05±5,01E-05 |          | -                 |           | 8,18E-05±1,23E-05 |          |
| NS-24 | 66,64255 | 44,80836 | 41,3±5,8          | 663,6±93,3   | 25,0±8,5          | 402,2±137,3 | -                 | -        | 0,18±0.08         | 2,82±1.26 | 0,5±0,1           | 8,0±1,3  |
|       |          |          | 1,79E-02±2,52E-03 |              | 1,09E-02±3,71E-03 |             | -                 |          | 7,61E-05±3,41E-05 |           | 2,16E-04±3,45E-05 |          |
| NS-27 | 66,6461  | 44,79869 | 41,5±5,9          | 438,2±62,5   | 16,8±6,2          | 177,0±65,3  | 1,0±0,5           | 10,5±5,6 | 0,06±0.02         | 0,68±0.23 | 1,9±0,3           | 20,5±2,9 |
|       |          |          | 1,18E-02±1,69E-03 |              | 4,78E-03±1,76E-03 |             | 2,84E-04±1,52E-04 |          | 1,84E-05±6,09E-06 |           | 5,55E-04±7,77E-05 |          |
| NS-25 | 66,64774 | 44,83378 | 32,8±4,8          | 498,3±72,7   | 19,6±6,9          | 297,8±104,9 | 1,0±0,6           | 15,8±8,9 | -                 | -         | 1,6±0,4           | 24,4±5,5 |
|       |          |          | 1,35E-02±1,97E-03 |              | 8,05E-03±2,84E-03 |             | 4,27E-04±2,42E-04 |          | -                 |           | 6,59E-04±1,49E-04 |          |
| NS-26 | 66,65185 | 44,84578 | 30,9±4,5          | 341,2±49,2   | 20,2±7,4          | 222,5±82,1  | 0,5±0,2           | 5,5±2,2  | -                 | -         | 0,8±0,1           | 8,9±1,4  |
|       |          |          | 9,22E-03±1,33E-03 |              | 6,01E-03±2,22E-03 |             | 1,48E-04±5,90E-05 |          | -                 |           | 2,40E-04±3,85E-05 |          |
